# Supplementary material for: Proteomic Analysis of Hylocereus polyrhizus Reveals Metabolic Pathway Changes
Source: MDPI journal article supplement (doi:10.3390/ijms17101606), 2016-09-28
Supplement: s1 [file s1]

# Supplementary Materials: Proteomic Analysis of *Hylocereus polyrhizus* Reveals Metabolic Pathway Changes

Qingzhu Hua, Qianjun Zhou, Susheng Gan, Jingyu Wu, Canbin Chen, Jiaqiang Li, Yaoxiong Ye, Jietang Zhao, Guibing Hu and Yonghua Qin

**Table S1.** Differentially expressed on genes but not on proteins ( $p$ -value < 0.05, fold change (pro) < 1.3, fold change (RNA) > 2).

| Gene Ontology (GO) Classification                                                                                 | Number (No.) Protein |
|-------------------------------------------------------------------------------------------------------------------|----------------------|
| <b>Biological Process (BP)</b>                                                                                    |                      |
| GO:0055114//oxidation-reduction process                                                                           | 18                   |
| GO:0006184//GTP catabolic process                                                                                 | 4                    |
| GO:0015937//coenzyme A biosynthetic process                                                                       | 2                    |
| GO:0006526//arginine biosynthetic process                                                                         | 2                    |
| GO:0006032//chitin catabolic process                                                                              | 1                    |
| GO:0016998//cell wall macromolecule catabolic process                                                             | 1                    |
| GO:0006839//mitochondrial transport                                                                               | 1                    |
| GO:0009156//ribonucleoside monophosphate biosynthetic process                                                     | 1                    |
| <b>Molecular Function (MF)</b>                                                                                    |                      |
| GO:0016705//oxidoreductase activity, acting on paired donors, with incorporation or reduction of molecular oxygen | 9                    |
| GO:0005506//iron ion binding                                                                                      | 9                    |
| GO:0020037//heme binding                                                                                          | 9                    |
| GO:0045735//nutrient reservoir activity                                                                           | 3                    |
| GO:0004055//argininosuccinate synthase activity                                                                   | 2                    |
| GO:0004594//pantothenate kinase activity                                                                          | 2                    |
| GO:0008184//glycogen phosphorylase activity                                                                       | 2                    |
| GO:0016811//hydrolase activity, acting on carbon-nitrogen (but not peptide) bonds, in linear amides               | 2                    |
| GO:0043531//ADP binding                                                                                           | 2                    |
| GO:0003868//4-hydroxyphenylpyruvate dioxygenase activity                                                          | 1                    |
| GO:0004314//[acyl-carrier-protein] S-malonyltransferase activity                                                  | 1                    |
| GO:0004556//alpha-amylase activity                                                                                | 1                    |
| GO:0004568//chitinase activity                                                                                    | 1                    |
| GO:0008061//chitin binding                                                                                        | 1                    |
| GO:0030674//protein binding, bridging                                                                             | 1                    |
| GO:0051015//actin filament binding                                                                                | 1                    |
| GO:0003840//gamma-glutamyltransferase activity                                                                    | 1                    |
| GO:0008113//peptide-methionine (S)-S-oxide reductase activity                                                     | 1                    |
| GO:0016701//oxidoreductase activity, acting on single donors with incorporation of molecular oxygen               | 1                    |
| GO:0016790//thiolester hydrolase activity                                                                         | 1                    |
| <b>Cellular Component (CC)</b>                                                                                    |                      |
| GO:0043234//protein complex                                                                                       | 2                    |
| GO:0005874//microtubule                                                                                           | 2                    |
| GO:0009538//photosystem I reaction center                                                                         | 1                    |
| GO:0031966//mitochondrial membrane                                                                                | 1                    |
| GO:0009522//photosystem I                                                                                         | 1                    |
| GO:0042555//MCM complex                                                                                           | 1                    |

**Table S2.** Differentially expressed on genes but on proteins ( $p$ -value < 0.05, fold change (pro) < 1.3, fold change (RNA) > 2).

| KEGG Pathway                                        | No. Protein |
|-----------------------------------------------------|-------------|
| ko00330 Arginine metabolism                         | 5           |
| ko00250 Alanine aspartate glutamate metabolism      | 4           |
| ko00620 Pyruvate metabolism                         | 4           |
| ko00710 Carbon fixation in photosynthetic organisms | 4           |
| ko00061 Fatty acid biosynthesis                     | 3           |
| ko00910 Nitrogen metabolism                         | 3           |
| ko01004 Lipid biosynthesis proteins                 | 3           |
| ko00199 Cytochrome P450                             | 2           |
| ko00130 Ubiquinone terpenoid-quinone biosynthesis   | 2           |
| ko00770 Pantothenate biosynthesis                   | 2           |
| ko04540 Gap junction                                | 2           |
| ko00905 Brassinosteroid biosynthesis                | 1           |

**Table S3.** Negative correlation ( $p$ -value < 0.05, FC (pro) > 1.5, FC (RNA) > 2).

| GO Classification                                          | No. Protein |
|------------------------------------------------------------|-------------|
| <b>Biological Process (BP)</b>                             |             |
| GO:0042549//photosystem stabilization                      | 1           |
| GO:0006090//pyruvate process                               | 1           |
| GO:0006231//dTTP biosynthetic process                      | 1           |
| GO:0006545//glycine process                                | 1           |
| GO:0006869//lipid transport                                | 1           |
| GO:0009165//nucleotide biosynthetic process                | 1           |
| <b>Molecular Function (MF)</b>                             |             |
| GO:0003677//DNA binding                                    | 4           |
| GO:0008234//cysteine-type peptidase activity               | 2           |
| GO:0009055//electron carrier activity                      | 2           |
| GO:0003756//protein disulfide activity                     | 1           |
| GO:0005337//nucleoside transmembrane transporter activity  | 1           |
| GO:0008146//sulfotransferase activity                      | 1           |
| GO:0050242//pyruvate, phosphate dikinase activity          | 1           |
| GO:0004146//dihydrofolate activity                         | 1           |
| GO:0004799//thymidylate activity                           | 1           |
| GO:0004866//endopeptidase inhibitor activity               | 1           |
| GO:0004869//cysteine-type endopeptidase inhibitor activity | 1           |
| GO:0016671//oxidoreductase activity                        | 1           |
| <b>Cellular Component (CC)</b>                             |             |
| GO:0009279//cell outer membrane                            | 1           |
| GO:0009654//oxygen evolving complex                        | 1           |
| GO:0019898//extrinsic to membrane                          | 1           |
| GO:0009523//photosystem II                                 | 1           |

**Table S4.** Negative correlation ( $p$ -value < 0.05, FC (pro) > 1.5, FC (RNA) > 2).

| KEGG Pathway                  | No. Protein |
|-------------------------------|-------------|
| ko04142 Lysosome              | 4           |
| ko04145 Phagosome             | 2           |
| ko04210 Apoptosis             | 1           |
| ko04115 p53 signaling pathway | 1           |
| ko04712 Circadian plant       | 1           |

Table S5. Gradient used for grading of polypeptides.

| Time (min)   | 0  | 2  | 17 | 29 | 30 | 31 | 36 | 37 | 57 |
|--------------|----|----|----|----|----|----|----|----|----|
| Buffer A (%) | 96 | 92 | 80 | 65 | 55 | 5  | 5  | 96 | 96 |
| Buffer B (%) | 4  | 8  | 20 | 35 | 45 | 95 | 95 | 4  | 4  |

Table S6. Gradient used for LC-MS/MS.

| Time (min)   | 0  | 5  | 6  | 48 | 62 | 65 | 70 | 70.5 | 90 |
|--------------|----|----|----|----|----|----|----|------|----|
| Buffer A (%) | 97 | 97 | 94 | 83 | 70 | 20 | 20 | 97   | 97 |
| Buffer B (%) | 3  | 3  | 6  | 17 | 30 | 80 | 80 | 3    | 3  |

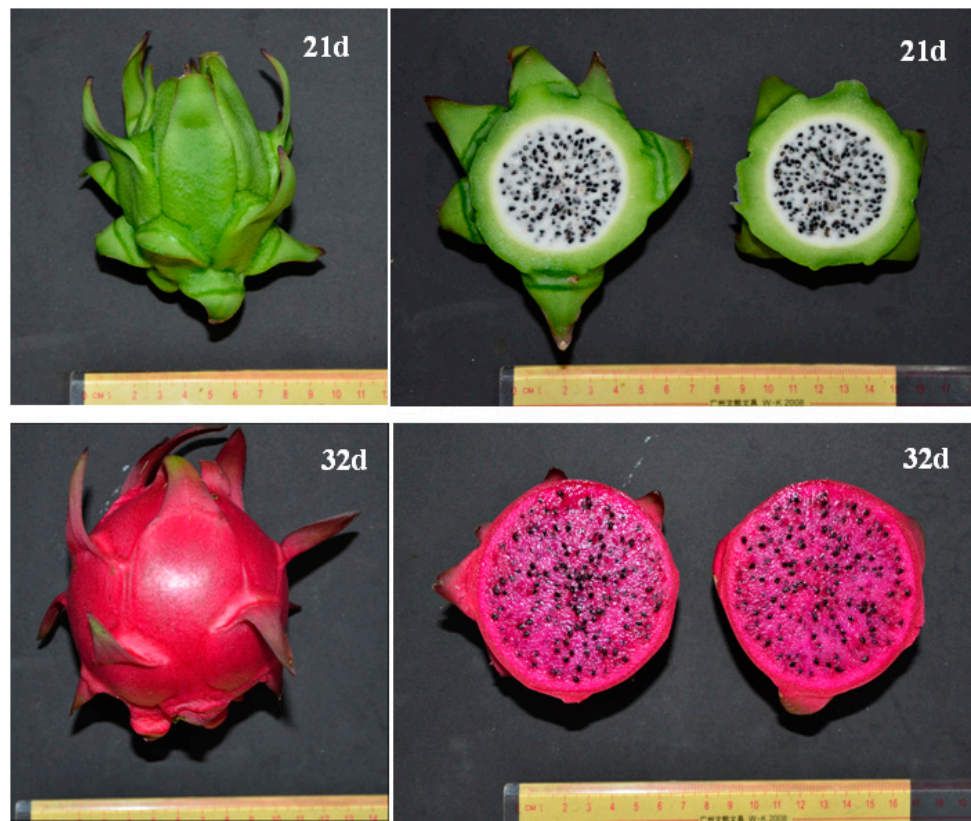

Figure S1. Pictures of pitaya fruits (entire and cut in to observe internal color) collected on the 21st day (white pulp) and 32rd day (red white).
